# Supplementary material
Source: PubMed Central journal article supplement (PMC11541656)

**Geographically widespread and novel hemotropic mycoplasmas and bartonellae in Mexican free-tailed bats and sympatric North American bat species: Supplemental Materials**

Table S1. PCR primers and amplification parameters used in this study

Table S2. GLM results for Mexican free-tailed bats from Bracken Cave, Texas

Table S3. GAM results for Mexican free-tailed bats from from Selman Bat Cave, Oklahoma

Figure S1. Consensus Bayesian phylogeny of *Mycoplasma* 23S rRNA sequences

Figure S2. Cross-tabulation of *Mycoplasma* genotypes by geography

Figure S3. Consensus Bayesian phylogeny of *Mycoplasma rpoB* sequences

Figure S4. Cross-tabulation of *Bartonella* genotypes by geography

Table S1. PCR primers and amplification parameters used in this study.

| Primers               | Sequence                             | Organism and gene                       | Expected product (bp) | Temperature (°C) / time (seconds) |              |           |           | Cycles | Ref              |
|-----------------------|--------------------------------------|-----------------------------------------|-----------------------|-----------------------------------|--------------|-----------|-----------|--------|------------------|
|                       |                                      |                                         |                       | Initial denaturation              | Denaturation | Annealing | Extension |        |                  |
| CS 443f               | GCTATGTCTGCATTCTATCA                 | Bartonellae <i>gltA</i>                 | ~700                  | 95/120                            | 95/30        | 48/30     | 72/120    | 40     | 1                |
| CS 1210r              | GATCYTCAATCATTTCTTTCCA               |                                         |                       |                                   |              |           |           |        |                  |
| Bhcs 781p             | GGGGACCAGCTCATGGTGG                  |                                         | ~300                  | 95/180                            | 95/30        | 55/30     | 72/120    | 40     | 2                |
| Bhcs 1137n            | AATGCAAAAAGAACAGTAAACA               |                                         |                       |                                   |              |           |           |        |                  |
| UNI_16S_hemoFnew      | TGAATAAGTGACAGCWAACATATGTGCC         | Hemoplasma 16S rRNA                     | ~850–900              | 95/300                            | 95/50        | 60/60     | 72/60     | 55     | 3*<br>This study |
| UNI_16S_hemoR         | GACGGGCGGTGTGTACAAGACCTG             |                                         |                       |                                   |              |           |           |        |                  |
| UNI_rpoB_hemoF1       | CCTAAYTTRARYATWMGKGACGTTCACTATT<br>C | Hemoplasma <i>rpoB</i> (primer set 1)** | ~785                  | 95/300                            | 95/50        | 55/60     | 72/60     | 55     | This study       |
| UNI_rpoB_hemoR1_1     | GAAGAMARRATAATDGCATCYTCATAGTTGT<br>A |                                         |                       |                                   |              |           |           |        |                  |
| UNI_rpoB_hemoF1       | CCTAAYTTRARYATWMGKGACGTTCACTATT<br>C | Hemoplasma <i>rpoB</i> (primer set 2)** | ~1280                 | 95/300                            | 95/50        | 55/60     | 72/90     | 55     | This study       |
| UNI_rpoB_hemoR1_2     | ACAGGAGTWCCATCYTCYARRTAWGGCAT        |                                         |                       |                                   |              |           |           |        |                  |
| UNI_23S_Myc_Ur_cladeF | CCCAGACCATKGGGYAAGCCTA               | Hemoplasma 23S rRNA                     | ~1500–80              | 95/300                            | 95/50        | 58/60     | 72/90     | 55     | 3                |
| UNI_23S_Myc_Ur_cladeR | GAGACAGTCAAGAGATGGTTACAC             |                                         |                       |                                   |              |           |           |        |                  |

\*Primers were slightly modified based on available hemoplasma 16S rRNA gene data

\*\*Both sets of primers were used to amplify the hemoplasma *rpoB* gene. The *rpoB* primers were designed based on the conserved sequences found within the *rpoB* gene sequences of known hemotropic mycoplasmas and closely related *Mycoplasma* species.

1. Birtles RJ, Raoult D. Comparison of partial citrate synthase gene (*gltA*) sequences for phylogenetic analysis of *Bartonella* species. *International Journal of Systematic and Evolutionary Microbiology*. 1996;46(4):891-7.

2. Norman AF, Regnery R, Jameson P, Greene C, Krause D. Differentiation of *Bartonella*-like isolates at the species level by PCR-restriction fragment length polymorphism in the citrate synthase gene. *Journal of Clinical Microbiology*. 1995;33(7):1797-803.
3. Volokhov DV, Norris T, Rios C, Davidson MK, Messick JB, Gulland FM, Chizhikov VE. Novel hemotrophic mycoplasma identified in naturally infected California sea lions (*Zalophus californianus*). *Veterinary Microbiology*. 2011;149(1-2):262-8.

Table S2. Results of GLMs with mean bias reduction for hemoplasma and *Bartonella* spp. positivity in Mexican free-tailed bat samples from Bracken Cave in Texas ( $n = 48$ ; model 4). Reference levels include bats sampled in August 2021 and non-reproductive bats.

|               | hemoplasmas |       |      | <i>Bartonella</i> spp. |       |      |
|---------------|-------------|-------|------|------------------------|-------|------|
| Parameter     | OR          | $ z $ | $p$  | OR                     | $ z $ | $p$  |
| Intercept     |             | 2.25  | 0.02 |                        | 1.96  | 0.05 |
| December 2021 | 0.40        | 0.51  | 0.61 | 0.74                   | 0.25  | 0.80 |
| March 2022    | 1.63        | 0.45  | 0.65 | 1.22                   | 0.22  | 0.83 |
| Reproductive  | 1.53        | 0.33  | 0.74 | 2.67                   | 0.95  | 0.34 |

Table S3. Results of GAMs for hemoplasma and *Bartonella* spp. positivity in Mexican free-tailed bat samples from Selman Bat Cave in Oklahoma ( $n = 146$  and  $n = 145$ , respectively). Non-reproductive bats serve as the reference (only females were reproductive). Predictors are presented with model coefficients or estimated degrees of freedom (EDF) and test statistics

| Term         | hemoplasmas |      |      |          |       | <i>Bartonella</i> spp. |      |      |          |      |
|--------------|-------------|------|------|----------|-------|------------------------|------|------|----------|------|
|              | OR          | z    | EDF  | $\chi^2$ | $p$   | OR                     | z    | EDF  | $\chi^2$ | $p$  |
| Intercept    |             | 4.67 |      |          | <0.01 |                        | 2.77 |      |          | 0.01 |
| Reproductive | 0.39        | 1.36 |      |          | 0.17  | 0.79                   | 0.53 |      |          | 0.60 |
| s(Week)      |             |      | 2.10 | 14.02    | 0.001 |                        |      | 1.75 | 6.68     | 0.02 |

Figure S1. Consensus Bayesian phylogeny of partial 23S rRNA mycoplasma sequences from this study (highlighted in bold and colored by geography; see Table 1 for genotype assignments) and reference sequences from bats and other mammals. Nodes are colored by posterior probability (nodes with less than 50% support are not shown). Hemoplasmas with *Candidatus* species names proposed here are indicated by asterisks and have paired 16S rRNA sequences in Figure 1.

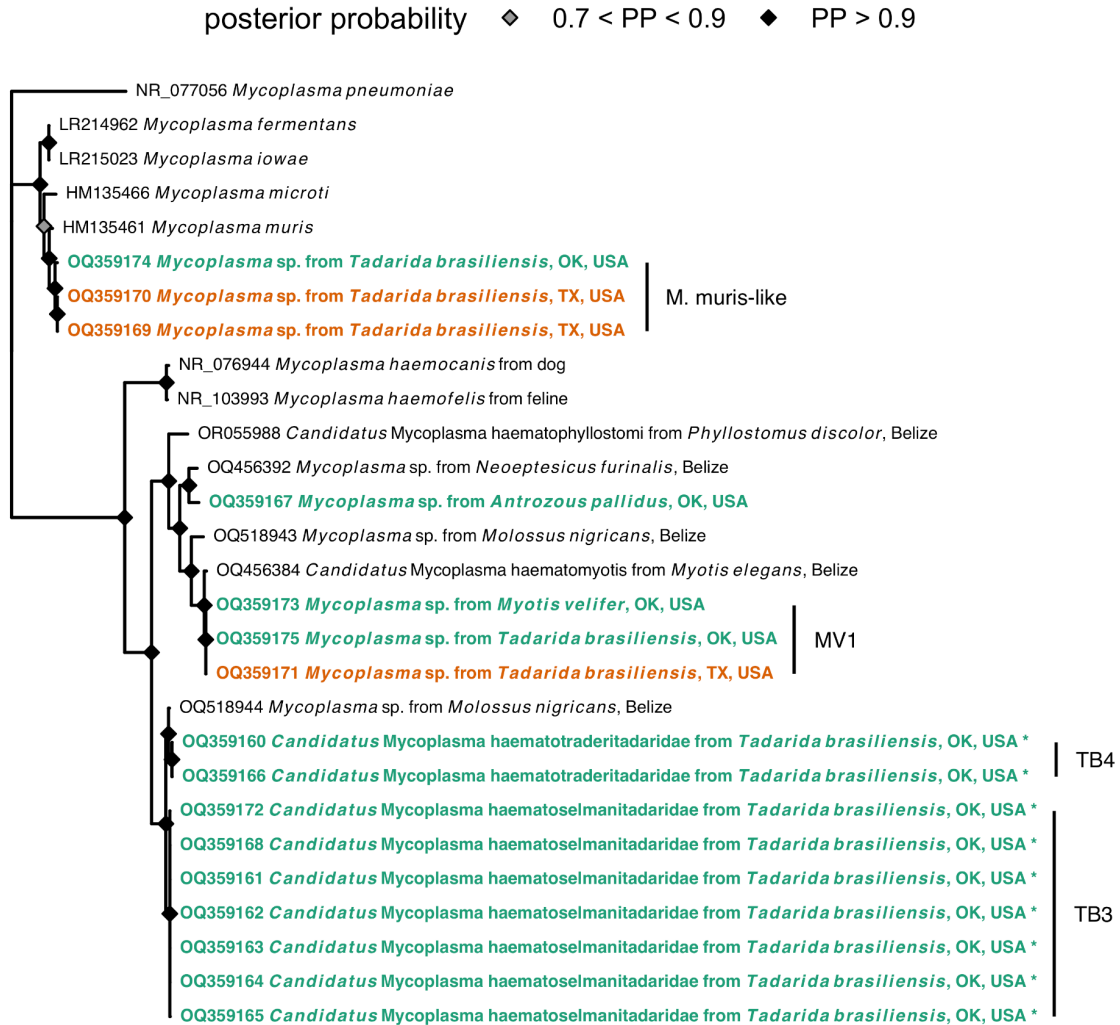

Figure S2. Cross-tabulation of *Mycoplasma* genotypes by geography, including all bat species.

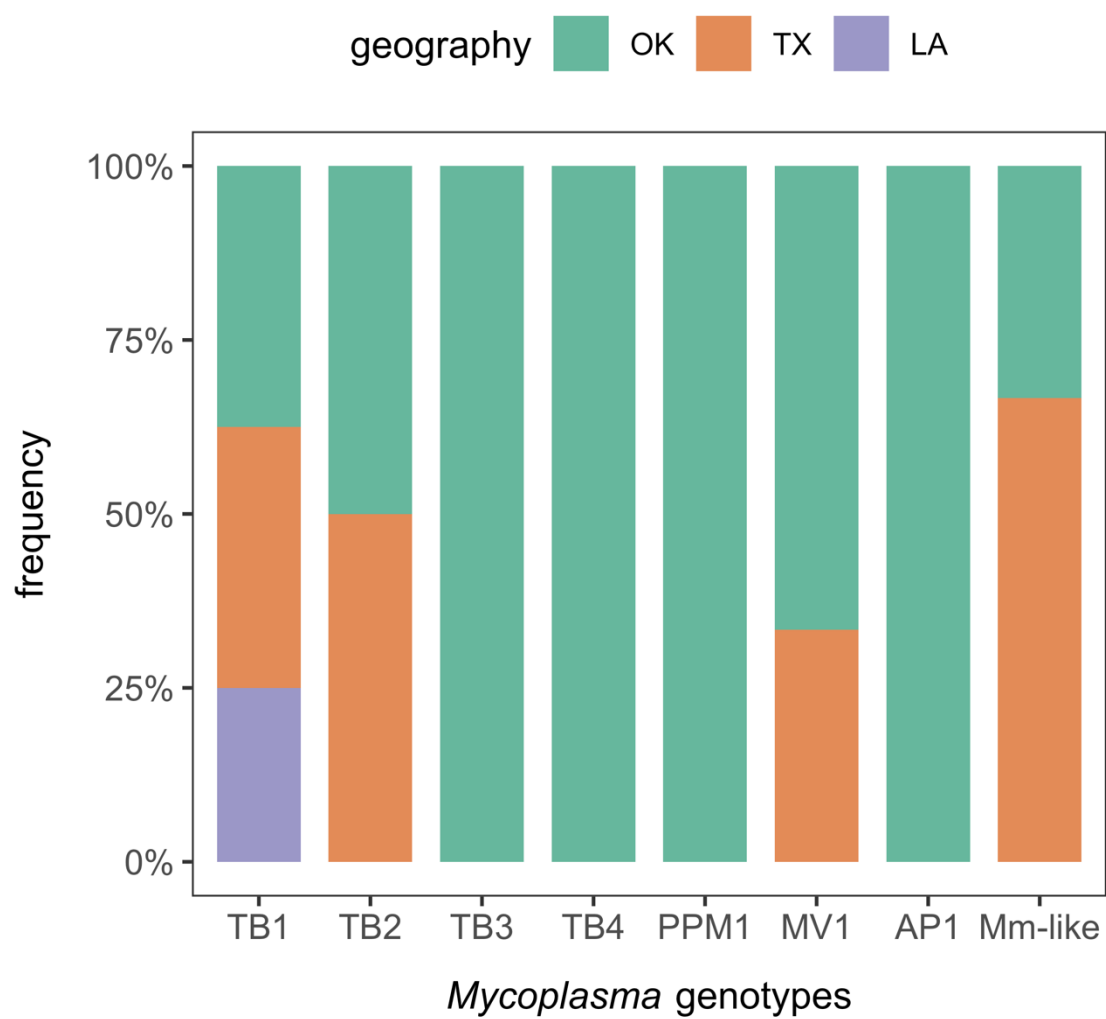

Figure S3. Consensus Bayesian phylogeny of partial *rpoB* mycoplasma sequences from this study (highlighted in bold and colored by geography; see Table 1 for genotype assignments) and reference sequences from bats and other mammals. Nodes are colored by posterior probability (nodes with less than 50% support are not shown). Hemoplasmas with *Candidatus* species names proposed here are indicated by asterisks and have paired 16S rRNA sequences in Figure 1.

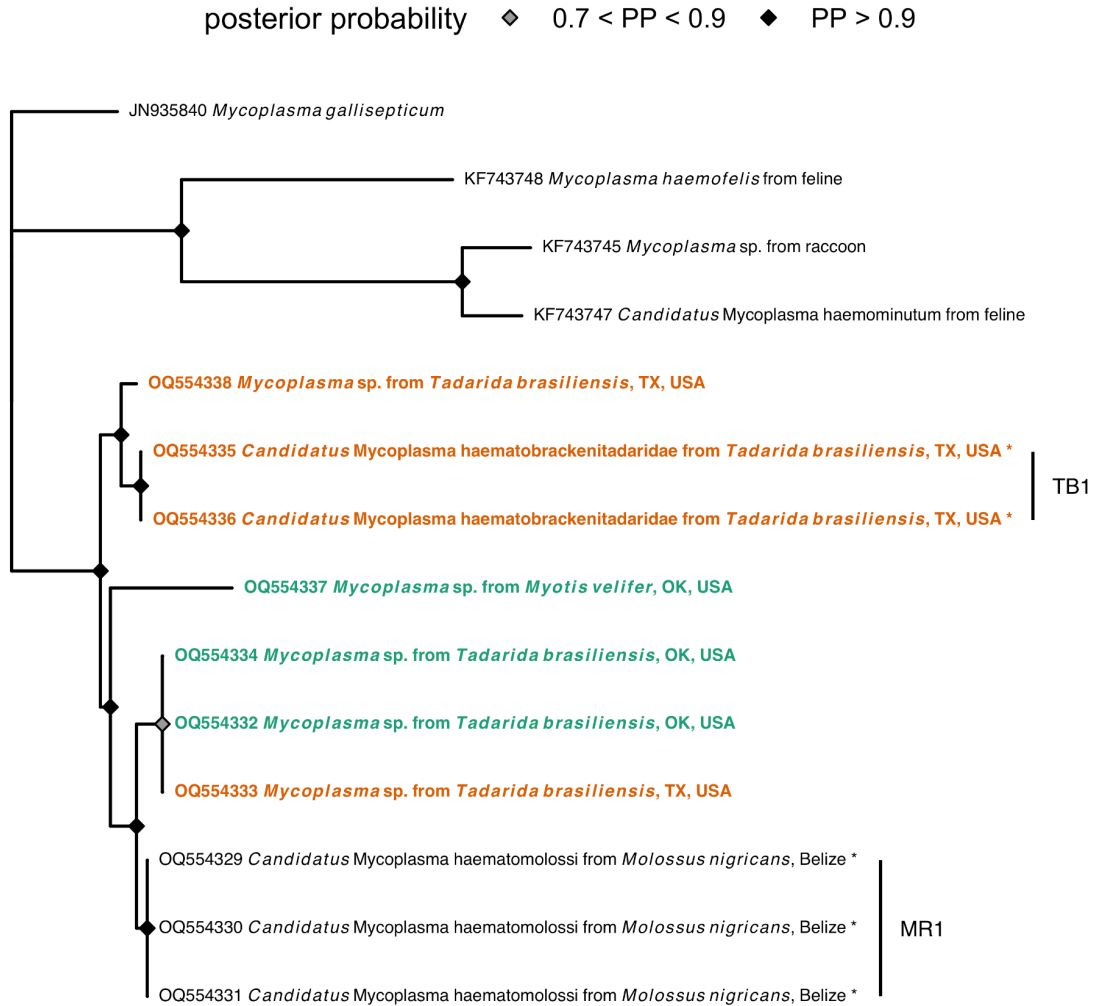



Figure S4. Cross-tabulation of *Bartonella* genotypes by geography, including all bat species.

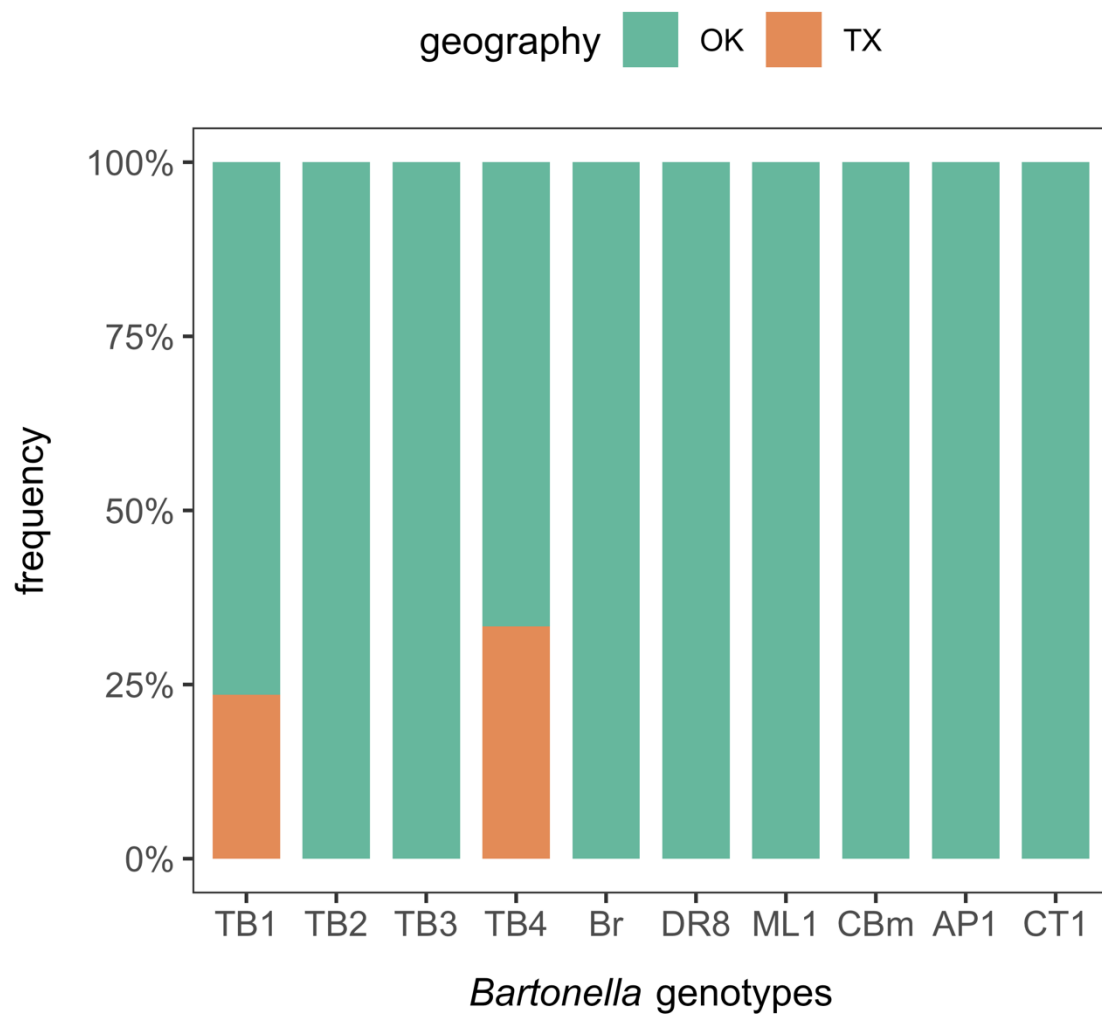

Supplement: media-1.pdf [file media-1.pdf]
